# Supplementary material for: Leptin receptor signaling via Janus kinase 2/Signal transducer and activator of transcription 3 impacts on ovarian cancer cell phenotypes
Source: PubMed Central journal article supplement (PMC5706816; doi:10.18632/oncotarget.19873), 2017-08-03
Supplement: oncotarget-08-93530-s001.pdf [file oncotarget-08-93530-s001.pdf]

# Leptin receptor signaling via Janus kinase 2/Signal transducer and activator of transcription 3 impacts on ovarian cancer cell phenotypes

## SUPPLEMENTARY MATERIALS

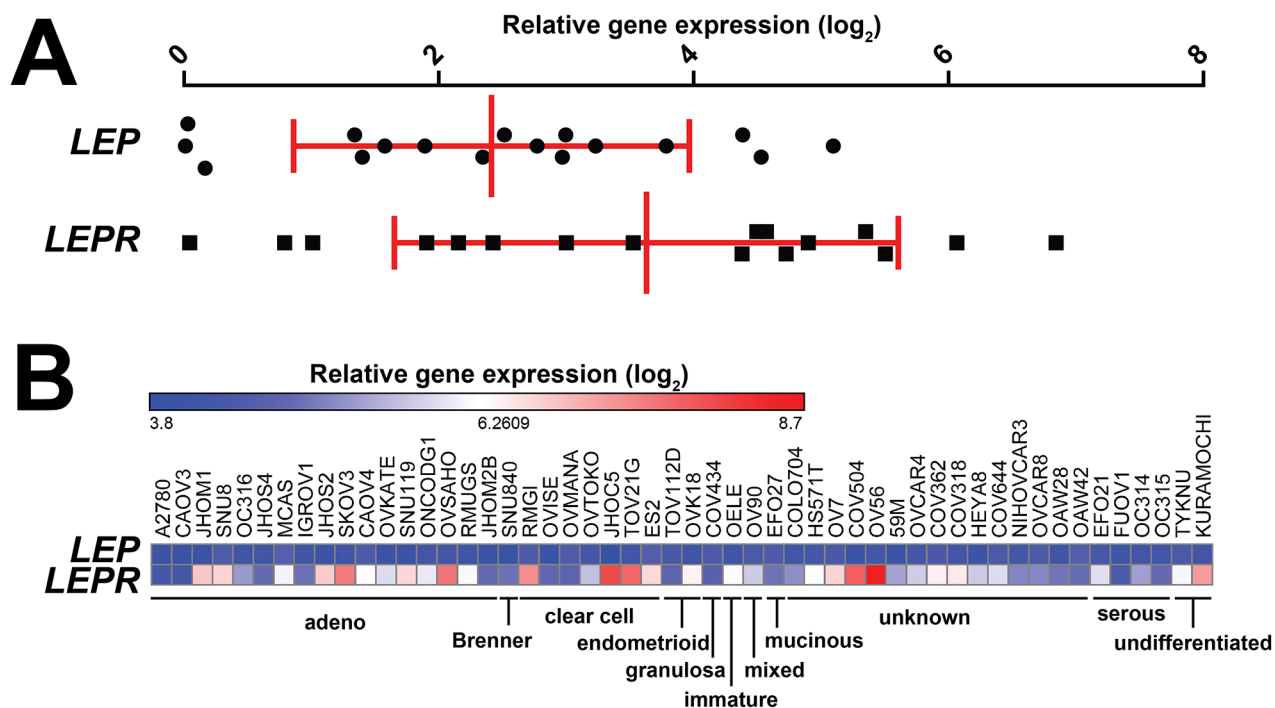

**Supplementary Figure 1: Expression of leptin/LEPR in ovarian cancer.** (A) Relative gene expression of *LEP* and *LEPR* in Grade 3 ovarian carcinoma samples was analyzed by qRT-PCR and normalized relative to *ACTB*, as indicated, showing mean and SEM. (B) Relative gene expression of *LEP* and *LEPR* in 52 ovarian cancer cell lines, which are shown along with their subtype designation. This is presented as a ‘heat map’ with the range of expression levels indicated in the key.

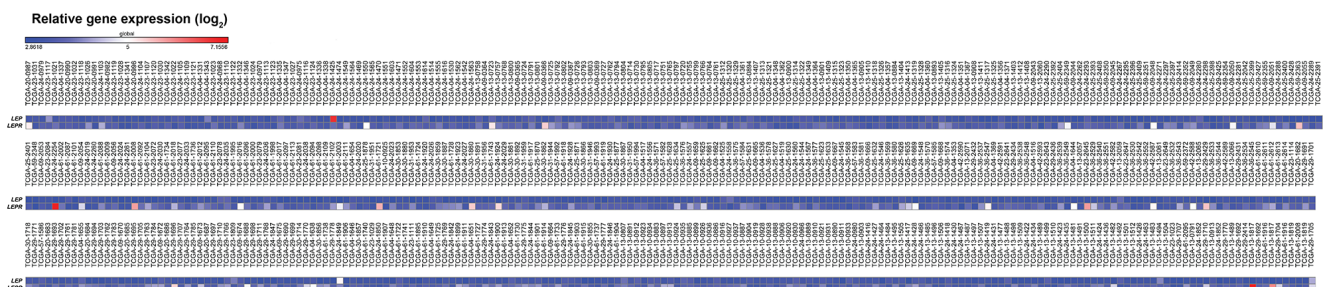

**Supplementary Figure 2: Expression of leptin/LEPR in ovarian cancer patients.** Relative gene expression of *LEP* and *LEPR* in 484 ovarian cancer samples, presented as a ‘heat map’ with the range of expression levels indicated in the key.

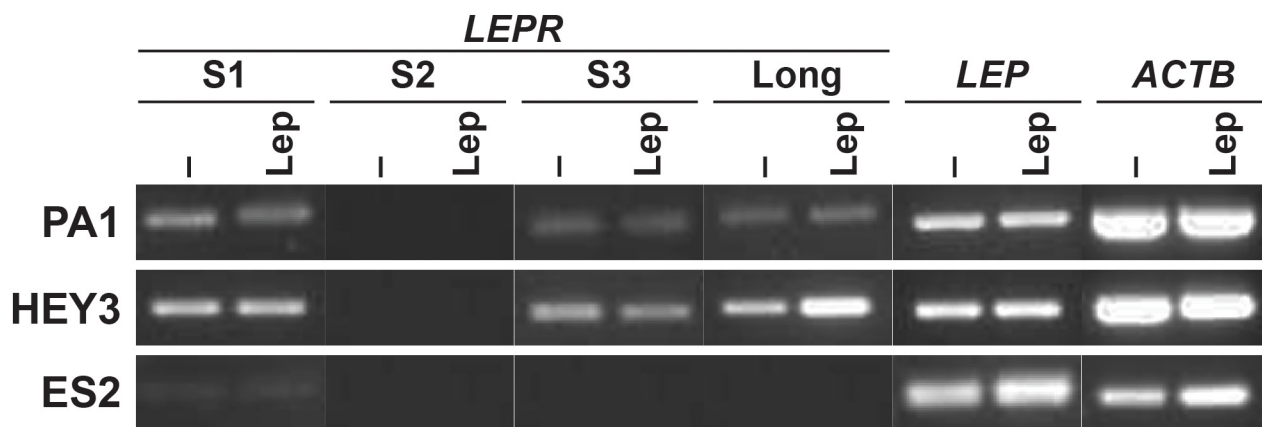

**Supplementary Figure 3: Expression of leptin and LEPR isoforms in ovarian cancer cells.** Expression of *LEP* and *LEPR* in ovarian cancer cell lines. Cells, either untreated (-) or treated with 100 ng/ml leptin (Lep), were analysed by RT-PCR for expression of the indicated gene and isoform, including *ACTB* as a control.

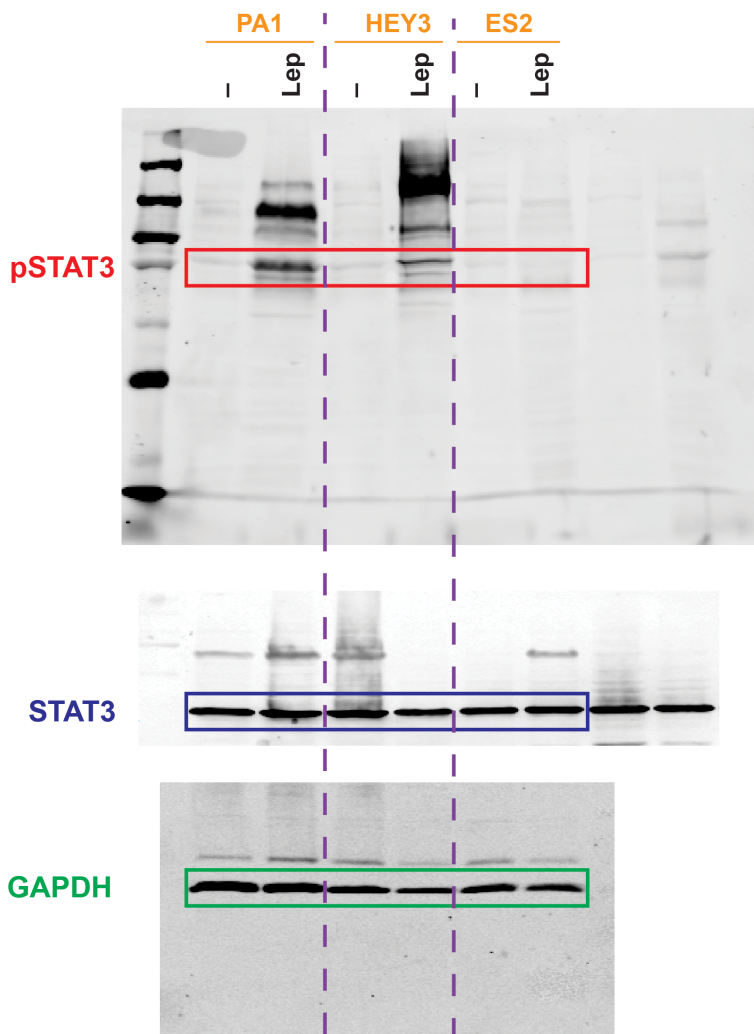

**Supplementary Figure 4: STAT3 activation by leptin.** Lysates from the indicated cell lines, either untreated (-) or treated for 45 min with 100 ng/ml leptin (Lep), were analyzed Western blot with anti-phospho-STAT3 (upper), along with anti-STAT3 (middle) and anti-GAPDH (lower) to confirm equivalent loading. Shown is a representative of three independent experiments.

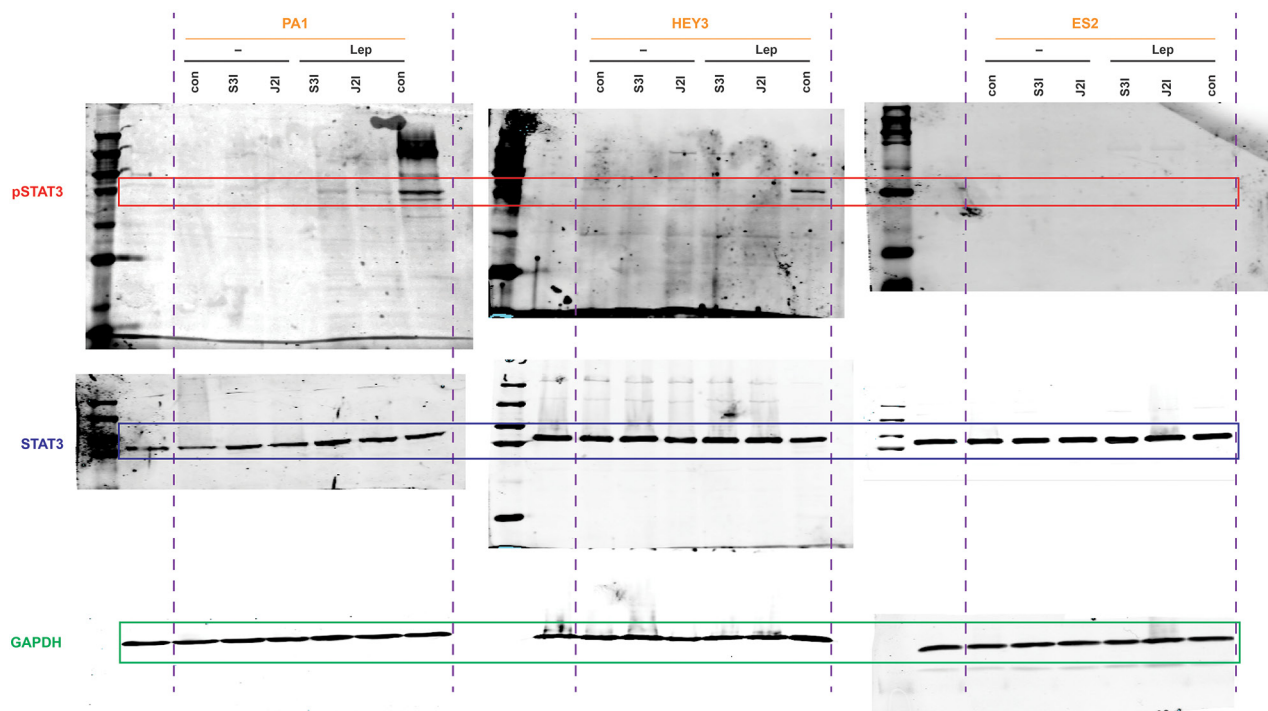

**Supplementary Figure 5: Inhibition of leptin-induced STAT3 activation by JAK2 and STAT3 inhibitors.** Lysates were prepared from cells, either untreated (–) or treated with 100 ng/ml leptin (Lep), without inhibitors (con) or with specific inhibitors for STAT3 (S3I) or JAK2 (J2I), as indicated, and analyzed for STAT3 activation as described in Supplementary Figure 4. Shown is a representative of three independent experiments.

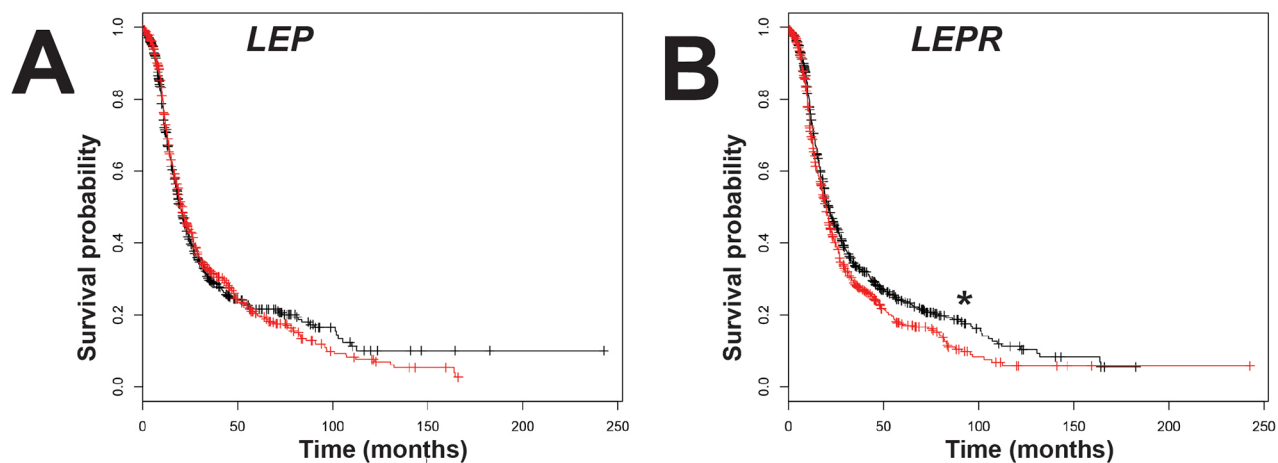

**Supplementary Figure 6: Impact of leptin/LEPR expression on ovarian cancer patient survival.** Overall survival curves of serous ovarian cancer patients expressing high (above median, red) versus low (below median, black) levels of *LEP* (A) or *LEPR* (B) (\* $p < 0.05$ ).

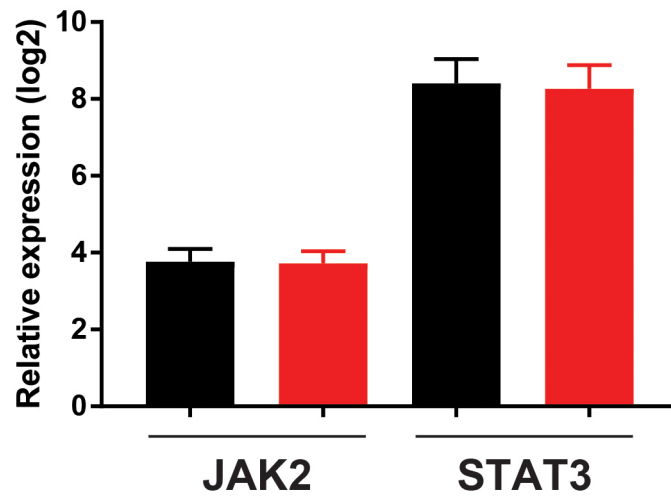

**Supplementary Figure 7: Expression of JAK2 and STAT3 in patient cohort.** Relative expression of JAK2 and genes STAT3 in ovarian cancer patients expressing high (above median, red) versus low (below median, black) levels of both *LEP* and *LEPR*.
